# Supplementary material
Source: MDPI journal article supplement (https://www.mdpi.com/2073-4360/3/2/875)
Supplement: s1 [file s1]

## A Possibility for Construction of Iodine Cleaning System Based on Doping for $\pi$ -Conjugated Polymers

Hiromasa Goto

Institute of Materials Science, Graduate School of Pure and Applied Sciences, University of Tsukuba,  
Tsukuba, Ibaraki, 305-8573, Japan

E-Mail: gotoh@ims.tsukuba.ac.jp; Tel.: +81-29-853-5128; Fax: +81-29-853-4490

**Figure S1.** Quartz micro-balance measurement with readout microscopy for *in-situ* vapor phase doping of iodine for the PANI/pulp sample.

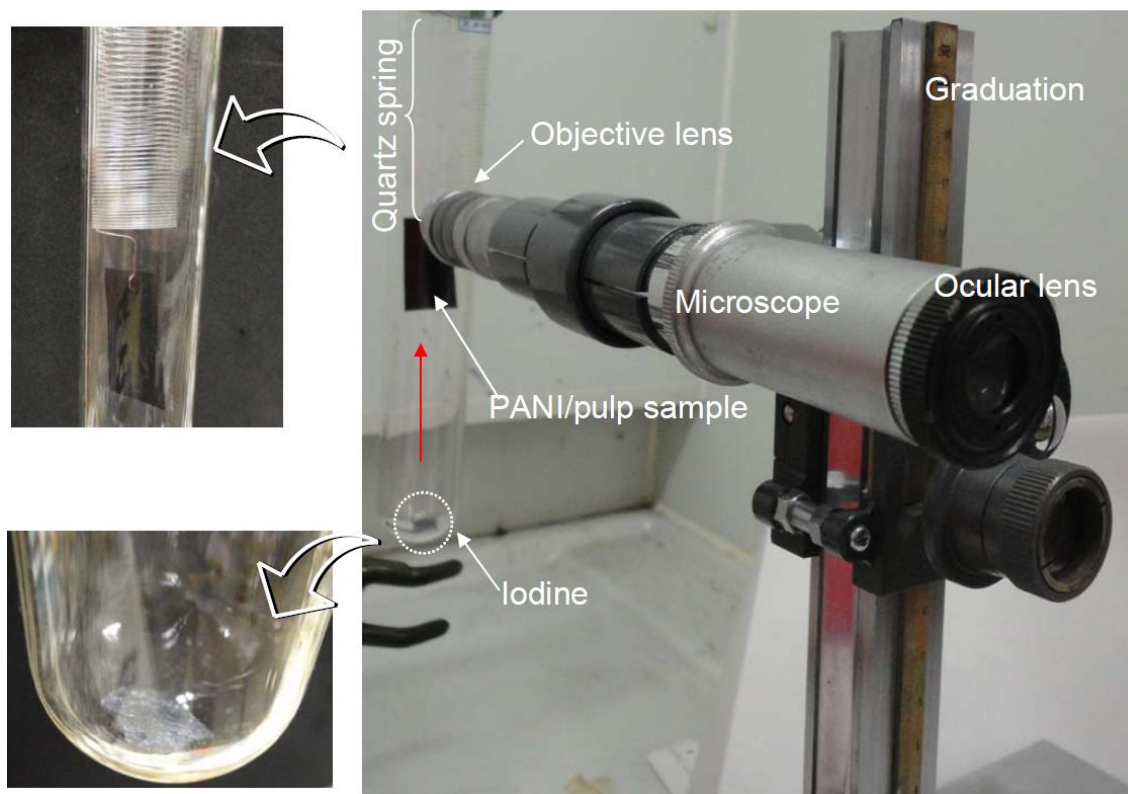

**Scheme S1.** General formula of  $\beta$ -decay (1), and  $^{131}\text{I}$  decay as an example (2).

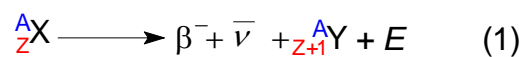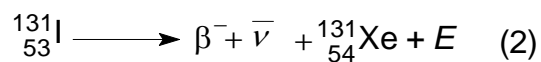

Gamma-decay of  $^{131}\text{Xe}$  occurs following after beta-decay. Half life time of  $^{131}\text{I}$  is 8.02 days, and half life time of  $^{131}\text{Xe}$  is 11.84 days [1,2].  $\bar{\nu}$  = antineutrino,  $E$  = energy.

## References

1. *Chronological Scientific Tables*, 2004 ed.; National Astronomical Observatory, Maruzen Co., Ltd.: Tokyo, Japan, 2003.
2. Eisenbud, M. *Environmental Radioactivity*, 3rd ed.; Academic Press: Orland, France, 1987.
